# Supplementary material for: NEWS2 Is Superior to qSOFA in Detecting Sepsis with Organ Dysfunction in the Emergency Department
Source: PubMed Central journal article supplement (PMC6723972; doi:10.3390/jcm8081128), 2019-07-29
Supplement: jcm-08-01128-s001.pdf [file jcm-08-01128-s001.pdf]

**Supplementary Material**

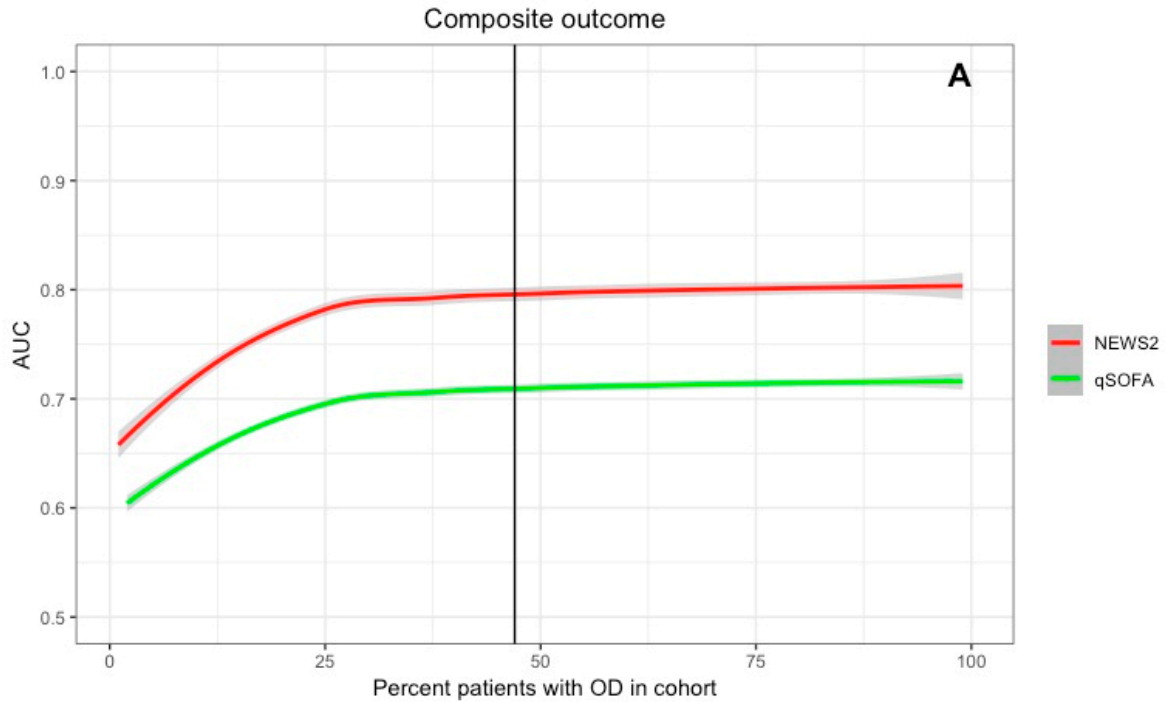

**Figure 1.** The performance of NEWS2 and qSOFA change with the frequency of organ dysfunction in the cohort.

Patients were divided in two groups as to the presence or absence of organ dysfunction (excluding neurological dysfunction). Samples from the two groups were drawn to mimic cohorts with the proportion of patients with organ dysfunction ranging from 1% to 99% in steps of 1%. For each proportion of patients with organ dysfunction 100 stochastic cohorts were drawn with replacement and the AUC-values for NEWS2 and qSOFA were calculated and the median was calculated and plotted. The vertical line represents the proportion of patients with organ dysfunction in the original whole cohort.

**Table 1.** National Early Warning Score 2 (NEWS2).

|                          | 3     | 2      | 1         | 0          | 1               | 2               | 3             |
|--------------------------|-------|--------|-----------|------------|-----------------|-----------------|---------------|
| Respiration rate         | <9    |        | 9–11      | 12–20      |                 | 21–24           | >24           |
| SpO <sub>2</sub> Scale 1 | <92   | 92–93  | 94–95     | >95        |                 |                 |               |
| SpO <sub>2</sub> Scale 1 | <84   | 84–85  | 86–87     | >92 on air | 93–94 on oxygen | 95–96 on oxygen | >96 on oxygen |
| Air or Oxygen            |       | Oxygen |           | Air        |                 |                 |               |
| SBP                      | <91   | 91–100 | 101–110   | 111–219    |                 |                 | >219          |
| Pulse                    | <41   |        | 41–50     | 51–90      | 91–110          | 111–130         | >130          |
| Consciousness            |       |        |           | Alert      |                 |                 | VPCU          |
| Temperature              | <35.1 |        | 35.1–36.0 | 36.1–38.0  | 38.1–39.0       | >39.0           |               |

**Table 2.** Periods of inclusion.

| Site                   | Catchment area | Period of inclusion                               | Days with inclusion |
|------------------------|----------------|---------------------------------------------------|---------------------|
| <b>Cohort A</b>        |                |                                                   |                     |
| Lund                   | 334 000        | 2011-03-30 – 2011-11-01                           | 117                 |
| Örebro <sup>1</sup>    | 180 000        | 2011-04-24 – 2011-12-07                           | 87                  |
| Malmö                  | 420 000        | 2011-03-12 – 2011-11-11                           | 67                  |
| Linköping              | 150 000        | 2011-05-17 – 2011-09-14                           | 38                  |
| <b>Cohort B</b>        |                |                                                   |                     |
| Lund                   | 334 000        | 2015-02-02 – 2015-02-27 + 2016-01-21 – 2016-03-18 | 62                  |
| Bern <sup>2</sup>      | 1 500 000      | 2015-02-18 – 2015-04-10                           | 33                  |
| Vancouver <sup>2</sup> | 650 000        | 2015-03-11 – 2015-04-10                           | 23                  |
| Helsingborg            | 250 000        | 2015-04-13 – 2016-01-21                           | 84                  |

<sup>1</sup>only at ED for infectious diseases, <sup>2</sup>more hospitals in the catchment area.

**Table 3.** Definitions for comorbidities.

|                        |                                                                                                                                                                                                                                                                                                                  |
|------------------------|------------------------------------------------------------------------------------------------------------------------------------------------------------------------------------------------------------------------------------------------------------------------------------------------------------------|
| <b>Diabetes</b>        | - <b>All patients with a diabetes diagnosis</b>                                                                                                                                                                                                                                                                  |
| Cardiovascular Disease | - Ischemic heart disease including previous myocardial infarction or present medication for angina pectoris<br>- Chronic heart failure requiring continuous medication<br>- Peripheral vascular disease including claudicatio intermittens                                                                       |
| Renal Disease          | - Proof of elevated serum creatinine registered as chronic in medical history<br>- Chronic kidney replacement therapy<br>- Chronic renal failure.<br>- Haemodialysis or chronic peritoneal dialysis                                                                                                              |
| Respiratory Disease    | - Chronic obstructive or restrictive disease that requires daily medication or results in limitations in daily life<br>- Diagnosis of pulmonary hypertension<br>- Ongoing medication for other lung diseases (e.g. sarcoidosis, lung fibrosis, tuberculosis)<br>- Asthma bronchiale requiring regular medication |
| Liver Disease          | - Cirrhosis score with a positive biopsy and documented portal hypertension,<br>- Previous episodes with high gastro-intestinal bleeding due to portal hypertension,<br>- Previous episodes with liver failure, coma or encephalopathy<br>- Other chronic hepatic disease                                        |
| Malignancy             | - Proven by imaging, biopsy, surgery or by tumour markers                                                                                                                                                                                                                                                        |
| Immunodeficiency       | - Ongoing (or present) immunosuppressive therapy, chemotherapy, or radiotherapy<br>- Haematological malignancy such as leukaemia, lymphoma and myeloma<br>- HIV/AIDS                                                                                                                                             |

**Table S4.** Missing data.

|                                | Cohort A <i>n</i> = 555 |    | Cohort B <i>n</i> = 707 |    |
|--------------------------------|-------------------------|----|-------------------------|----|
|                                | n                       | %  | n                       | %  |
| <b>Systolic Blood Pressure</b> | 4                       | <1 | 6                       | <1 |
| <b>Heart Frequency</b>         | 1                       | <1 | 3                       | <1 |
| <b>SaO2</b>                    | 10                      | 2  | 24                      | 3  |
| <b>Respiratory Frequency</b>   | 7                       | 1  | 17                      | 2  |
| <b>Temperature</b>             | 8                       | 1  | 23                      | 3  |
| <b>Mental Status</b>           | 6                       | 1  | 5                       | <1 |
| <b>Lactate</b>                 | 32                      | 6  | 232                     | 33 |
| <b>HBP</b>                     | 18                      | 3  | 178                     | 25 |
| <b>Oxygen treatment</b>        | 6                       | 1  | 24                      | 3  |

**Table 5.** AUC for different risk stratification scores for sepsis with organ dysfunction (excl organ dysfunction in central nervous system or hyperlactemia), admission to intensive care within 72 hours due to an infection or infection-related mortality within 72 hours from enrolment, missing values were substituted by multiple imputation.

|                            | qSOFA     | qSOFA incl lactate | qSOFA incl HBP | NEWS2     | NEWS2 incl lactate | NEWS2 incl HBP |
|----------------------------|-----------|--------------------|----------------|-----------|--------------------|----------------|
| Cohort A                   |           |                    |                |           |                    |                |
| AUC                        | 0.71      | 0.73               | 0.79           | 0.79      | 0.80               | 0.82           |
| 95% CI                     | 0.67–0.75 | 0.69–0.77          | 0.75–0.83      | 0.76–0.83 | 0.76–0.84          | 0.78–0.85      |
| <i>p</i> compared to qSOFA | reference | 0.52               | 0.01           | 0.01      | <0.01              | <0.01          |
| <i>p</i> compared to NEWS2 | 0.01      | 0.04               | 1              | reference | 0.72               | 0.27           |
| Cohort B                   |           |                    |                |           |                    |                |
| AUC                        | 0.63      | 0.63               | 0.67           | 0.70      | 0.70               | 0.71           |
| 95% CI                     | 0.58–0.67 | 0.58–0.67          | 0.63–0.72      | 0.66–0.74 | 0.66–0.74          | 0.67–0.76      |
| <i>p</i> compared to qSOFA | reference | 1                  | 0.23           | 0.03      | 0.03               | 0.01           |
| <i>p</i> compared to NEWS2 | 0.03      | 0.03               | 0.35           | reference | 1                  | 0.75           |
